1 **Title:** Investigation of DPPC liposomes reveals their capability to entrap Aroclor 1260, an emerging  
2 environmental pollutant

3 **Authors:** Andrew Lozano<sup>2</sup> and Monica D. Rieth<sup>1\*</sup>

4 **Address:** <sup>1</sup>Department of Chemistry, Southern Illinois University Edwardsville, 44 South Circle Drive,  
5 Edwardsville, Illinois 62026, U.S.A.; Phone: 618-650-3561; Fax: 618-650-3556; email:  
6 [mrieth@siue.edu](mailto:mrieth@siue.edu)

7 <sup>2</sup>Pfizer Inc. Analytical Research and Development, Biotherapeutics Department, 875  
8 Chesterfield Parkway West, Chesterfield, Missouri 63017, U.S.A.

9 \*corresponding author

10

11

12

13

14

15

16

17

18

19

20

21

22

23

24

25

26

27

28

29 **Keywords:** liposomes, environmental pollutants, PCBs, differential scanning calorimetry, spectroscopy

30

31

32 **Abstract**

33 Persistent organic pollutants (POPs) are a class of organic compounds that can accumulate in biological  
34 and ecological environments due to their resistive nature to chemical, thermal and photo degradation.  
35 Polychlorinated biphenyls (PCBs) are a class of man-made POPs that saw wide-spread use in commercial  
36 and industrial infrastructure as both an insulator and coolant in electrical transformers and capacitors.  
37 2,2',3,3',4,4'-hexachlorobiphenyl (HCBP) was one of the most widely produced PCBs. As these  
38 mechanical structures fail or are decommissioned, PCBs are released into the soil, migrate to the water  
39 table, and eventually spread to nearby ecosystems by rain and wind. The stability of POPs and specifically  
40 PCBs leave few options for environmental waste removal. Conventionally, liposomes have been used for  
41 their drug delivery capabilities, but here we have chosen to investigate their capability in removing this  
42 class of emerging environmental pollutants. Liposomes are small, nonpolar lipid bi-layered aggregates  
43 capable of capturing a wide variety of both polar and nonpolar compounds.  
44 Dipalmitoylphosphatidylcholine (DPPC) is a well-characterized lipid that can be derived from natural  
45 sources. It is a phospholipid typically found as a major component of pulmonary surfactant mixtures.  
46 Liposomes were prepared using probe-tip sonication for both direct and passive incorporation of the HCBP  
47 compound. Assimilation was assessed using both differential scanning calorimetry and UV-Vis  
48 spectroscopy. After direct incorporation of HCBP the phase transition temperature,  $T_m$ , decreased from  
49 40.8 °C to 37.4 °C. A subsequent UV-Vis analysis of HCBP by both direct and passive incorporation  
50 showed an increase in HCBP incorporation proportionate to the length of exposure time up to 24 hours and  
51 relative to the initial quantity present during the direct incorporation. Together the decrease in  $T_m$  and  
52 increase in absorbance are indicative of HCBP incorporation and further demonstrate the potential for their  
53 use as a method of sustainable environmental cleanup.

54

55

56

57

## 58 **Introduction**

59 Liposomes are spherical-shaped vesicular nanoparticles that have tremendous potential in biomedical  
60 and bioengineering applications. They are bilayered nanostructures often comprised of phospholipids that  
61 form an aqueous core where small molecules can be encapsulated. Lipids can vary in both their chemical  
62 and physical properties giving rise to larger nanostructures with unique properties unto themselves. Lipids  
63 with varying chain lengths and different degrees of saturation can be introduced to tune them for different  
64 applications.<sup>1-5</sup> They are readily prepared using techniques like extrusion, sonication and rapid ethanol  
65 injection. Each of these methods influences properties such as size (diameter), lamellarity (single bilayer  
66 or multi-bilayer), and polydispersity (range of sizes).<sup>6-8</sup> Once prepared their phase behavior, drug  
67 permeability, and thermal stability can be investigated and characterized.<sup>9,10</sup> Other physical properties of  
68 interest include surface charge (zeta-potential) and bilayer fluidity.<sup>11-13</sup> They can also be used in molecular  
69 biology to facilitate organism transformation and transfection with foreign DNA or RNA.<sup>14-17</sup>

70 While they continue to be extensively studied for their applications in biomedical and bioengineering less  
71 is known about their use for environmental purposes. Here we used liposomes prepared with 1,2-  
72 dipalmitoyl-*sn*-glycero-3-phosphocholine, DPPC, to introduce a polychlorinated biphenyl compound in  
73 order to assess the capacity for these liposomes to entrap environmental pollutants. DPPC has reportedly  
74 been used to prepare liposomes for drug delivery and has also been investigated for its effects on membrane  
75 stability and permeability in biophysical studies. Other compounds like cholesterol, have also been  
76 incorporated which stabilizes liposomes under certain conditions. These effects can vary depending on  
77 other factors like liposome chain length and relative cholesterol abundance.<sup>12,18-23</sup> Interestingly, even small  
78 changes to conditions like preparation, pH, lipid chain-length and heterogeneity are sufficient to alter the  
79 physical behavior of liposomes and affect important aspects of their drug permeability and controlled  
80 release.<sup>10,24,25</sup>

81 Here we investigated the use of liposomes as a vehicle for the absorption of compounds posing a potential  
82 environmental hazard. One class of compounds considered to be a growing concern are persistent organic

83 pollutants (POPs).<sup>26-29</sup> These compounds can slowly leach into the ground water where they are deposited  
84 into the soil eventually leading to contamination of surrounding water sources. A major subclass of  
85 persistent organic pollutants are the polychlorinated biphenyl compounds, PCBs, which share a similar  
86 basic structural motif containing chlorine atoms substituted at various positions (2-10) about a biphenyl  
87 ring (Figure 1). These compounds are remarkably stable and resistant to environmental degradation causing  
88 them to accumulate and pose serious environmental and health concerns. They have been used industrially  
89 for their desirable electrical insulating and heat transfer properties as well as plasticizers in paint and other  
90 polymer-based commercial products. They are also reportedly released into the ground from landfill waste  
91 sources such as microplastics and can be released into the air upon incineration of waste materials posing  
92 respiratory dangers as well (Figure 2).<sup>30-32</sup> The origins of PCBs in the environment extend beyond industrial  
93 sources and became a growing concern in the early 1990s when they were discovered in commercial paint  
94 pigments.<sup>33-36</sup> Only now are we becoming increasingly aware of their potential threat to the environment  
95 and human health. Once exposed, PCBs, also known by their commercial name, Aroclor, can cross the cell  
96 membrane and bind with receptors in both human and mouse models leaving organisms susceptible to its  
97 unpredictable and sometimes negative effects.<sup>37-42</sup> They can also have significant environmental impacts  
98 by altering the local ecosystem and are believed to promote the growth and invasiveness of microbial  
99 species like cyanobacteria leading to formation of algal blooms.<sup>43</sup>

100 Current technologies have been adapted to address this issue, but here we report one of the first instances  
101 using a biomaterial-based approach to capture these compounds. We sought to capture a polychlorinated  
102 biphenyl compound, Aroclor 1260, also known as 2,2',3,3', 4,4'-hexachlorobiphenyl (HCBP), using pure  
103 DPPC liposomes. This compound is a congener of the polychlorinated biphenyl family and can induce  
104 human receptor activation and mimic the role of adipose tissue in hormone signaling and reproductive  
105 processes as well as patterns of protein expression.<sup>38,41,44</sup> We monitored this process by measuring changes  
106 in the thermal stability of the resulting liposome mixtures in conjunction with a spectrophotometric analysis  
107 to track HCBP.

108 Differential scanning calorimetry is a powerful biophysical method that can be used to assess the stability  
109 and extract thermodynamic properties of protein-protein interactions, protein-lipid interactions, lipid-lipid  
110 interactions, protein-nucleic acid interactions and carbohydrate-lipid interactions. It can also be used to  
111 monitor protein unfolding and gain insight into factors that stabilize protein structure.<sup>17,46,47</sup> Using this  
112 approach we found that increasing concentrations of HCBP in our liposome preparations generally  
113 broadened and lowered the characteristic transition temperature,  $T_m$ , previously reported for pure DPPC  
114 liposomes. Further, a UV-Vis spectrophotometric analysis revealed that this compound readily  
115 incorporates into liposomes in both a direct manner when they are co-dissolved and prepared together and  
116 also passively when pre-formed liposomes are exposed to the compound. This system may be useful for  
117 the pretreatment of wastewater and potable water where current methods are unable to extract these types  
118 of compounds.<sup>48,49</sup>

## 119 **Materials and Methods**

### 120 *Preparation of DPPC Liposomes with 2,2', 3,3', 4,4'-HCBP*

121 The saturated lipid, 1,2-dipalmitoyl-sn-glycero-3-phosphocholine (DPPC), was purchased from Avanti  
122 Polar Lipids (cat.# 850355, Alabaster, AL). No further purification and characterization was necessary.  
123 Ampules containing 2,2',3,3',4,4'-hexachlorobiphenyl solution (Aroclor 1260) at a concentration of 1  
124 mg/mL dissolved in hexanes were purchased from AccuStandard® (cat# C-260S-H-10X, New Haven, CT)  
125 The compound was used without further purification.

126 DPPC liposomes were prepared at a total lipid composition of 25 mg/mL. Mixtures were prepared based  
127 on the following molar ratios of HCBP to DPPC: 0, 1, 5, 10, 20%. To prepare samples, DPPC was weighed  
128 out using an analytical balance to a mass of  $25 \pm 0.2$  mg. The calculated mass of dry DPPC was weighed  
129 into a 2 mL glass screw top vial followed by the addition of 1 mg/mL Aroclor 1260 solution. The vials  
130 were then back-filled to a total volume of 1 mL with 200-proof ethanol. Each sample was prepared

131 according to the calculated ratios of HCBP:DPPC and summarized in Table 1. The dried lipid films were  
132 stored long-term at -20 °C.

133 **Table 1. Preparation of Molar Ratios of DPPC and 2,2', 3,3', 4,4'-hexachlorobiphenyl (HCBP)**

| <b>Molar Ratio<br/>HCBP/DPPC<br/>(mol%)</b> | <b>Mass of<br/>DPPC (mg)</b> | <b>Concentration<br/>of DPPC<br/>(mM)*</b> | <b>Total volume<br/>of HCBP (μL)</b> | <b>HCBP (mg)</b> | <b>Total volume<br/>of EtOH (μL)</b> |
|---------------------------------------------|------------------------------|--------------------------------------------|--------------------------------------|------------------|--------------------------------------|
| <b>0</b>                                    | 25.0                         | 34.1                                       | 0.00                                 | 0.00             | 1000                                 |
| <b>1</b>                                    | 24.9                         | 33.9                                       | 122.9                                | 0.123            | 877.1                                |
| <b>5</b>                                    | 24.4                         | 32.8                                       | 614.5                                | 0.615            | 385.5                                |
| <b>10</b>                                   | 23.8                         | 32.0                                       | 1229.0                               | 1.229            | 385.5                                |
| <b>20</b>                                   | 22.5                         | 30.3                                       | 2458.2                               | 2.458            | 180.6                                |

134

135 To prepare liposomes from the dried lipid films, 1.0 mL of 20 mM HEPES, 100 mM NaCl pH 7.4 was  
136 added to the glass vial containing the lipid film. Samples were vortexed to mix and hydrate the lipid-HCBP  
137 film. This resulted in a milky white suspension that contained some larger white particulates. To suspend  
138 the lipids more homogeneously the mixture was sonicated for 2 minutes using a probe-tip sonicator (Fisher  
139 Scientific, Hampton, NH) set to 20% duty cycle with a pulse time of 2 seconds followed by a rest period of  
140 2 seconds. One cycle was sufficient to homogeneously suspend the lipids to a milky white liquid with no  
141 visible large white particulates. The cycle was repeated three additional times. A total of four cycles at 2  
142 minutes per cycle was carried out on each sample (8 minutes total). A 2-second rest period between pulses  
143 was incorporated to prevent excessive heating of the lipid mixtures. Cooling the liposomes was kept to a  
144 minimum to avoid dropping too far below the  $T_m$  of DPPC, 41.0 °C, which can inhibit liposome formation.  
145 The supernatant was transferred to a clean 2.0 mL Eppendorf tube and centrifuged for 3 minutes at 10,000  
146 rpm. The supernatant was removed and again transferred to a clean 2.0 mL Eppendorf tube. Samples were  
147 stored overnight at 4 °C and DSC studies were carried out the following day. Samples were not prepared  
148 more than 16-24 hours in advance of the DSC studies to preserve sample integrity and minimize liposome  
149 degradation.

150

151 *Differential Scanning Calorimetry (DSC) scanning parameters*

152 Measurements were carried out on a VP-DSC high sensitivity scanning calorimeter (MicroCal,  
153 Northampton, MA, USA). All samples were scanned at a rate of 60 °C/hr beginning at 20 °C and ending  
154 at 70 °C. Samples were pre-equilibrated for 5-10 minutes at 20 °C (approximately room temperature) prior  
155 to the initial scan. The raw data were saved and plotted using KaleidaGraph version 4.5 scientific graphing  
156 program (Synergy software, Reading, PA). Prior to DSC analysis, stored liposome samples were removed  
157 from the refrigerator and left to equilibrate at room temperature for at least one hour. The samples were  
158 centrifuged at 10,000 rpm for 3 minutes to remove any unincorporated lipids. The supernatant was carefully  
159 transferred to a clean 2.0 mL Eppendorf tube. All samples were degassed for approximately 30 minutes  
160 along with 20 mM HEPES, 100 mM NaCl pH 7.4 buffer. HEPES buffer was chosen due to its pH stability  
161 over a broad temperature range. A scan of the buffer was acquired and collected and used for baseline  
162 subtraction. Due to concerns with irreversible degradation, one scan per sample was obtained and sample  
163 replicates were carried out on freshly prepared samples following the procedure outlined above.

164 *Preparation of passive diffusion of DPPC liposomes with 2,2',3,3',4,4'-HCBP*

165 Four samples of 25 mg/mL DPPC were prepared separately from HCPB by weighing 25 mg of dry DPPC  
166 powder into a 2 mL glass screw top vial followed by the addition of 1.0 mL of a 20 mM HEPES, 100 mM  
167 NaCl pH 7.4 buffer. Liposomes were then prepared from the samples using the probe-tip sonication method  
168 outlined above. Four samples and one control sample of 1 mg HCBP were prepared by adding 1.0 mL of  
169 HCBP solution (1 mg /mL in hexanes) into a 2 mL screw top glass vial and drying down under a steady  
170 stream of nitrogen gas until a dry film of HCBP appeared and constant mass was achieved. The previously  
171 prepared 25 mg/mL DPPC liposomes were then added to four of the 2 mL glass vials containing the dried  
172 HCBP film and placed on an end-over-end mixer for 4, 8, 12, and 24 hours to allow thorough exposure of  
173 the liposomes to the dried HCBP film. The control sample was combined with 1.0 mL of 20 mM HEPES,  
174 100 mM NaCl pH 7.4 buffer only, and placed on the end-over-end mixer for 24 hours. At each time interval,

175 the samples were recovered from each vial and transferred to a 2 mL Eppendorf tube for analysis by DSC  
176 using methods described above. Samples were also retained for UV-Vis analysis.

177 *UV-Vis spectroscopy analysis of 2,2', 3,3', 4,4'-HCBP*

178 The UV-Vis absorbance of 2,2', 3,3', 4,4'-HCBP was assessed using a Cary 300 UV-Vis spectrophotometer  
179 (Agilent Technologies, Santa Clara, CA). The maximum absorbance was measured using an HCBP sample  
180 prepared by transferring 1.0 mL of the 1 mg/mL stock HCBP hexane solution to a 2 mL glass vial and  
181 drying down under a steady stream of nitrogen gas until constant mass was achieved. To the glass vial was  
182 added 1.0 mL of 200 proof ethanol and the contents were mixed for 1 minute using a benchtop vortex mixer.  
183 In a quartz cuvette, 200 proof ethanol was used for both reference and sample cells and scanned from 800  
184 nm to 200 nm. Lambda max was found based on the maximum absorbance and corresponding wavelength.

185 Next, a standard curve was generated and the extinction coefficient was determined using the standard  
186 Beer-Lambert relationship. To prepare samples for the standard curve analysis solutions of 20, 15, 10, 8,  
187 6, 4, 2, and 0.5 µg/mL HCBP in ethanol (200 proof) were prepared from a working stock solution of 100  
188 µg/mL. The eight samples were measured at a wavelength of 236 nm using a standard benchtop UV/Vis  
189 spectrophotometer. Data were processed and the extinction coefficient was determined from the slope of  
190 the standard curve.

191 To measure HCBP directly incorporated into liposomes, samples from the DSC were recovered. To a semi-  
192 micro quartz cuvette 780-790 µL of 200-proof ethanol was added followed by 20-10 µL of the sample  
193 recovered from the DSC analysis. The sample was mixed well to solubilize the liposomes and the  
194 absorbance was measured at 236 nm. Absorbance measurements were kept between 0.2 and 1.2 and sample  
195 dilution were made accordingly.

196 Samples from the passive incorporation were recovered after 4, 8, 12 and 24-hour time points and diluted  
197 into 780 µL 200 proof ethanol in a quartz cuvette to a final volume of 800 µL. Absorbances were measured  
198 at 236 nm and % incorporation was determined from the 1 mg dried film. Residual HCBP was recovered



199 from the inside of each vial by flushing each vial twice with 20 HEPES, 100 mM NaCl pH 7.4 buffer.  
200 Ethanol was added to dissolve contents and 3  $\mu$ L was diluted in a quartz cuvette and the absorbance was  
201 measured. From the absorbance measurement and the calculated extinction coefficient the concentration  
202 of HCBP was found and % remaining could be determined.

## 203 **Results**

204 After each liposome preparation samples were centrifuged to remove unincorporated lipids and small  
205 bits of titanium from the sonicator probe. After centrifuging, a white pellet was visible at the bottom of the  
206 microfuge tube, which became more readily apparent in samples that contained higher amounts of HCBP.  
207 Samples were stored overnight at 4 °C to preserve sample integrity until measurements could be carried  
208 out, but not longer than 24 hours. Liposomes are only stable for a relatively short period of time before  
209 they begin to degrade and constituent lipids begin to precipitate out of solution.<sup>18,20,50</sup> After samples were  
210 removed from 4 °C and left to equilibrate at room temperature, they were centrifuged again at 10,000 x g  
211 for 3 minutes and a minimal white pellet was visible in all samples. Most of the samples were prepared  
212 ahead of time and stored overnight. DSC scans were carried out beginning at room temperature to avoid  
213 exposing the lipids to temperatures far below the  $T_m$  for DPPC, since cooler temperatures can also affect  
214 the fluidity of the lipid tails and accelerate liposome degradation.<sup>51</sup> The initial quantity of DPPC used for  
215 these experiments was previously optimized to ensure that an appreciable signal arising from the  $T_m$  would  
216 be captured. We found that 10 mg/mL and 25 mg/mL both gave the best signal, and subsequent studies  
217 were carried out using 25 mg/mL DPPC to also increase the loading capacity of the compound.

218 In Figure 3, panels A and B a small peak was visible in the DSC thermograms, which we attributed to  
219 residual unincorporated lipid that was not completely removed during centrifugation. In previous  
220 experiments samples prepared with 2, 5, 10 mg/mL DPPC following the method of sonication showed a  
221 noticeable decrease in this small peak with DSC analysis, which suggests what we believe to be  
222 unincorporated lipid varies in proportion to the total amount of lipid in the sample (manuscript under

223 review). Filtering the sample was avoided to minimize the risk of disrupting and altering the physical  
224 properties of the liposomes.

225 *Analysis of DSC thermograms shows that 2,2',3,3',4,4'-HCBP destabilizes liposomes*

226 The DSC raw tabulated data files were imported and processed using KaleidaGraph version 4.5 software.  
227 Data were normalized to zero and the baseline was subtracted. Figure 3 summarizes the DSC thermograms  
228 for each of the five samples including 0% HCBP (pure DPPC liposomes).

229 Analysis of the melting curves (thermograms) showed that pure DPPC liposomes had a major phase  
230 transition at 40.8 °C, which is consistent with what we expected based on previous work.<sup>52-55</sup> In the  
231 presence of HCBP, however, a distinct broadening in the melting curves occurred and the peak morphology  
232 changed becoming more broad and depressed with a more pronounced peak at the  $T_m$ .

233 **Table 2. Thermodynamic parameters from DSC**

| % mol DPPC | $T_m$ (°C) | $C_p$ (mcal/°C) | Area under Thermogram |
|------------|------------|-----------------|-----------------------|
| 0          | 40.8       | 18.39           | 100.2                 |
| 1          | 40.1       | 18.29           | 99.6                  |
| 5          | 40.4       | 17.75           | 94.5                  |
| 10         | 39.2       | 16.30           | 91.1                  |
| 20         | 37.4       | 7.04            | 84.5                  |

234  
235 The thermal stability of passively incorporated HCBP was also analyzed; however, there were no  
236 appreciable differences compared to pure DPPC liposomes that could be attributed to the presence of  
237 HCBP.

238 *Verification of 2,2',3,3',4,4'-HCBP incorporation into liposomes using UV-Vis analysis*

239 To evaluate the extent of HCBP incorporation into DPPC liposomes we used UV-Vis absorption  
240 spectroscopy. There is little reported on the absorption properties of HCBP (Aroclor 1260), therefore,  
241 initially a full spectrum scan was required to establish lambda max,  $\lambda_{max}$ . The scan showed that HCBP had  
242 a maximum absorbance at 236 nm in 200 proof ethanol. All subsequent samples were measured for HCBP  
243 incorporation at this wavelength. A standard curve was generated from which an extinction coefficient

244 could be determined. Using the slope of the line generated in Figure 5 an extinction coefficient of 26,455  
 245  $M^{-1}cm^{-1}$  was established.<sup>56</sup> To our knowledge a precise value for the extinction coefficient of Aroclor 1260  
 246 in ethanol has not been reported. We chose to investigate both the direct and passive incorporation of  
 247 HCBP. Table 3 summarizes the results from both studies. After 4 hours of exposure to HCBP, the  
 248 minimum exposure time, detectable levels of HCBP had already begun to appear in the liposome mixture.  
 249 Despite the clear presence of HCBP in these samples it was not enough to lower the phase transition  
 250 temperature and we found no appreciable changes in  $T_m$  from the DSC analysis (not shown). Incorporation  
 251 of HCBP increased proportionally with exposure time from 4 to 24 hours, but then gradually levels off as  
 252 it approaches 24 hours (Table 3). Figure 4 shows the % incorporation of HCBP in the passively absorbed  
 253 samples, which never reached more than 23% by weight beginning from a 1 mg dried film. For the direct  
 254 incorporation, up to 83.7% relative to the predicted theoretical quantity was determined for the 1% HCBP  
 255 sample. The % incorporation decreased with increasing HCBP concentration. In all cases, the passive  
 256 absorption did not significantly alter the transition temperature in the DSC for any of the samples.

257 **Table 3. Quantitative analysis of 2,2',3,3',4,4'-HCBP incorporation into liposomes**

| Direct Incorporation |            |                         |                                   | Passive Absorption   |            |                     |                                 |
|----------------------|------------|-------------------------|-----------------------------------|----------------------|------------|---------------------|---------------------------------|
| % mol DPPC           | HCBP mg/mL | Theoretical HCBP, mg/mL | % Incorporated (from Theoretical) | Time, hrs            | HCBP mg/mL | Residual HCBP mg/mL | % Incorporated (from 1 mg film) |
| 0                    | -----      | -----                   | -----                             | 24 hrs – Buffer only | ~ 0.00     | -----               | -----                           |
| 1                    | 0.105      | 0.123                   | 83.7                              | 4                    | 0.0241     | -----               | 2.41                            |
| 5                    | 0.378      | 0.615                   | 61.5                              | 8                    | 0.130      | 0.730               | 13.0                            |
| 10                   | 0.621      | 1.230                   | 50.5                              | 12                   | 0.219      | 0.645               | 21.9                            |
| 20                   | 0.705      | 2.460                   | 28.7                              | 24                   | 0.229      | 0.593               | 22.9                            |

258 \*All liposome samples were prepared with 25 mg/mL DPPC. The quantities were determined from concentrations based on  
 259 absorption measurements and calculated using the extinction coefficient of 2,2,3,3',4,4'-hexachlorobiphenyl, which was found to  
 260 be 26,455  $M^{-1}cm^{-1}$  from the standard curve in ethanol. Dissolution of HCBP (Aroclor 1260) into HEPES buffer was negligible  
 261 after 24 hours of passive exposure.

262

263

## 264 **Discussion**

265 We sought to investigate the effects of hexa-chlorinated biphenyl (HCBP), a congener of a class of  
266 environmental pollutants known as persistent organic pollutants on the thermal stability of DPPC liposomes  
267 using differential scanning calorimetry (DSC) and UV-Vis spectroscopy. From the DSC data we can  
268 evaluate relative liposome stability as a function of its melting temperature ( $T_m$ ) when we compare pure  
269 DPPC liposomes to those that were prepared or exposed to the environmental pollutant, HCBP. We found  
270 that when we increased HCBP content in the direct preparation the major temperature transition decreased  
271 indicating reduced thermal stability. This change was not detectable in samples that were passively exposed  
272 to HCBP, although, UV-Vis spectrophotometric analysis indicated that HCBP was present, but to a lesser  
273 degree. This is in contrast to what has been reported for compounds like cholesterol.<sup>12,57,58</sup> In the presence  
274 of cholesterol a reported broadening of the major temperature transition range occurs albeit toward higher  
275 temperature.<sup>22</sup> We surmise that in the absence of small molecules DPPC liposomes are free to pack more  
276 tightly with an ordering of the lipid tails giving rise to greater thermal stability. As HCBP is introduced it  
277 disrupts the lipid packing of the long chain fatty acid tails preventing them from assembling into a more  
278 ordered arrangement.<sup>11,18,59</sup> Structurally, cholesterol can intercalate itself between the lipid tails of DPPC  
279 and help stabilize hydrophobic interactions in part because it is reportedly more planar and rigid.<sup>50,60-62</sup>  
280 HCBP, having chlorine atoms at various substituted positions, does not have the same steric orientation that  
281 suggests it would behave in the same way. It lacks a fused ring system, which we predict gives rise to the  
282 observed thermal destabilization. In Figure 7, a schematic diagram shows how we envision and postulate  
283 HCBP incorporates into DPPC liposomes in both direct and passive preparations. The higher %  
284 incorporation from the direct preparation significantly destabilizes liposomes resulting in a lower observed  
285  $T_m$ . Though we did not specifically investigate how HCBP incorporation affects the size distribution, we  
286 believe it may have an effect based on the extensive peak broadening observed in the DSC thermograms  
287 (Figure 3).

288 We have shown that emerging toxic environmental compounds belonging to a class of persistent organic  
289 pollutants can be incorporated into DPPC liposomes both directly and passively using a 2,2',3,3',4,4'-  
290 HCBP polychlorinated biphenyl compound as a representative example. The direct preparation of  
291 liposomes in the presence of this compound results in an increased loading capacity overall compared to  
292 the passive absorption method. From a practical perspective, a passive approach may be more useful in  
293 downstream applications because there are fewer technical challenges. However, the loading capacity of  
294 these liposomes is substantially lower compared to the direct method of incorporation (Table 3). Passive  
295 incorporation is less disruptive to the thermal stability overall making them more robust and potentially  
296 adaptable to a biotechnology platform. The direct incorporation of HCBP into liposomes reaches a  
297 threshold at 10% HCBP before leveling off (Figure 6). Passive incorporation shows that after 12 hours of  
298 HCBP exposure the extent of incorporation begins to diminish leaving residual behind on the vial. This is  
299 a quantitative process and it does not appear that a significant portion of HCBP leaches into the buffer itself,  
300 which could imply that there is a preference for the compound to partition into the hydrophobic bilayer of  
301 the liposome (Figure 4). Additional factors like introducing unsaturated lipids and lipids with shorter chain  
302 lengths may help to increase the compound loading capacity, which is an interesting direction to pursue.

### 303 **Acknowledgements**

304 We would like to acknowledge the Department of Chemistry for their support.

305  
306  
307  
308  
309  
310  
311  
312  
313

314 **References**

- 315 (1) Papahadjopoulos, D.; Allen, T. M.; Gabizon, A.; Mayhew, E.; Matthay, K.; Huang, S. K.; Lee, K.  
316 D.; Woodle, M. C.; Lasic, D. D.; Redemann, C. *Proc. Natl. Acad. Sci.* **2006**, *88* (24), 11460–  
317 11464.
- 318 (2) Chen, J.; Cheng, D.; Li, J.; Wang, Y.; Guo, J. X.; Chen, Z. P.; Cai, B. C.; Yang, T. *Drug Dev. Ind.*  
319 *Pharm.* **2013**, *39* (2), 197–204.
- 320 (3) Bozzuto, G.; Molinari, A. *Int. J. Nanomedicine.* **2015**, *10*, 975–999.
- 321 (4) Jesorka, A.; Orwar, O. *Annu. Rev. Anal. Chem.* **2008**, *1* (1), 801–832.
- 322 (5) Kanášová, M.; Nesměrák, K. *Monatsh Chem.* **2017**, *148* (9), 1581–1593.
- 323 (6) Avanti Polar Lipids Inc. Preparing large, unilamellar vesicles by extrusion  
324 [http://avantilipids.com/index.php?option=com\\_content&view=article&id=1600&Itemid=381](http://avantilipids.com/index.php?option=com_content&view=article&id=1600&Itemid=381)  
325 (accessed Dec 11, 2018).
- 326 (7) Kono, K. *Adv. Drug Deliv. Rev.* **2001**, *53* (3), 307–319.
- 327 (8) Lapinski, M. M.; Castro-Forero, A.; Greiner, A. J.; Ofoli, R. Y.; Blanchard, G. J. *Langmuir* **2007**,  
328 *23* (23), 11677–11683.
- 329 (9) Bégu, S.; Girod, S.; Lerner, D. A.; Jardiller, N.; Tourné-Péteilh, C.; Devoisselle, J. M. *J. Mater.*  
330 *Chem.* **2004**, *14* (8), 1316–1320.
- 331 (10) Flaten, G. E.; Bunjes, H.; Luthman, K.; Brandl, M. *Eur. J. Pharm. Sci.* **2006**, *28* (4), 336–343.
- 332 (11) Zhao, L.; Feng, S. S.; Kocherginsky, N.; Kostetski, I. *Int. J. Pharm.* **2007**, *338* (1–2), 258–266.
- 333 (12) Briuglia, M. L.; Rotella, C.; McFarlane, A.; Lamprou, D. A. *Drug Deliv. Transl. Res.* **2015**, *5* (3),  
334 231–242.
- 335 (13) Nyholm, T.; Nylund, M.; Söderholm, A.; Slotte, J. P. *Biophys. J.* **2003**, *84* (2 I), 987–997.
- 336 (14) Dwarki, V. J.; Malone, R. W.; Verma, I. M. *Methods Enzymol.* **1993**, *217* (C), 644–654.
- 337 (15) Schäfer, J.; Höbel, S.; Bakowsky, U.; Aigner, A. *Biomaterials* **2010**, *31* (26), 6892–6900.
- 338 (16) Wan, C.; Allen, T. M.; Cullis, P. R. *Drug Deliv. Transl. Res.* **2014**, *4* (1), 74–83.
- 339 (17) Michanek, A.; Kristen, N.; Höök, F.; Nylander, T.; Sparr, E. *Biochim. Biophys. Acta - Biomembr.*  
340 **2010**, *1798* (4), 829–838.
- 341 (18) Michel, R.; Plostica, T.; Abezgauz, L.; Danino, D.; Gradzielski, M. *Soft Matter* **2013**, *9* (16),  
342 4167–4177.
- 343 (19) Lor, C.; Hirst, L. S. *Membranes (Basel)*. **2015**, *5* (4), 857–874.
- 344 (20) Armengol, X.; Estelrich, J. *J. Microencapsul.* **1995**, *12* (5), 525–535.
- 345 (21) Pilbat, A. M.; Szegletes, Z.; Kóta, Z.; Ball, V.; Schaaf, P.; Voegel, J. C.; Szalontai, B. *Langmuir*  
346 **2007**, *23* (15), 8236–8242.
- 347 (22) McMullen, T. P. W.; McElhaney, R. N. *BBA - Biomembr.* **1995**, *1234* (1), 90–98.
- 348 (23) Roy, B.; Guha, P.; Bhattarai, R.; Nahak, P.; Karmakar, G.; Chettri, P.; Panda, A. K. *J. Oleo Sci.*  
349 **2016**, *65* (5), 399–411.

- 350 (24) Laouini, A.; Jaafar-Maalej, C.; Limayem-Blouza, I.; Sfar, S.; Charcosset, C.; Fessi, H. *J. Colloid*  
351 *Sci. Biotechnol.* **2012**, *1* (2), 147–168.
- 352 (25) Hussein, G. A.; Pitt, W. G. *Adv. Drug Deliv. Rev.* **2008**, *60* (10), 1137–1152.
- 353 (26) Jones, K. C.; De Voogt, P. *Environ. Pollut.* **1998**, *100* (1–3), 209–221.
- 354 (27) Vallack, H. W.; Bakker, D. J.; Brandt, I.; Broström-Lundén, E.; Brouwer, A.; Bull, K. R.; Gough,  
355 C.; Guardans, R.; Holoubek, I.; Jansson, B.; Koch, R.; Kuylenstierna, J.; Lecloux, A.; Mackay, D.;  
356 McCutcheon, P.; Mocarelli, P.; Taalman, R. D. F.; Weavers, N. G. *Environ. Toxicol. Pharm.* **1998**,  
357 *6* (3), 143–175.
- 358 (28) Xu, W.; Wang, X.; Cai, Z. *Anal. Chim. Acta.* **2013**, *790*, 1–13.
- 359 (29) Fitzgerald, L.; Wikoff, D. S. *Encyclopedia of Toxicology: Third Edition.* **2014**, 820–825.
- 360 (30) Bakir, A.; Rowland, S. J.; Thompson, R. C. *Estuar. Coast. Shelf Sci.* **2014**, *140*, 14–21.
- 361 (31) Gózd-Barszczewska, A.; Koziół-Montewka, M.; Sikora, A.; Barszczewski, P.; Koziół, M. *Int. Rev.*  
362 *Allergol. Clin. Immunol.* **2014**, *20* (2), 95–100.
- 363 (32) Jamieson, A. J.; Malkocs, T.; Piertney, S. B.; Fujii, T.; Zhang, Z. *Nat. Ecol. Evol.* **2017**, *1* (3), 51.
- 364 (33) Hu, D.; Hornbuckle, K. C. *Environ. Sci. Technol.* **2010**, *44* (17), 6893–900.
- 365 (34) Jartun, M.; Ottesen, R. T.; Steinnes, E.; Volden, T. *Environ. Pollut.* **2009**, *157* (1) 295–302.
- 366 (35) Shanahan, C. E.; Spak, S. N.; Martinez, A.; Hornbuckle, K. C. *Environ. Sci. Technol.* **2015**, *49*  
367 (23), 13878–88.
- 368 (36) Robinson, G. K.; Lenn, M. J. *Biotechnol. Genet. Eng. Rev.* **1994**, *12*, 139–88.
- 369 (37) Hardesty, J. E.; Wahlang, B.; Falkner, K. C.; Clair, H. B.; Clark, B. J.; Ceresa, B. P.; Prough, R.  
370 A.; Cave, M. C. *Xenobiotica* **2017**, *47* (9), 807–820.
- 371 (38) Wahlang, B.; Cameron Falkner, K.; Clair, H. B.; Al-Eryani, L.; Prough, R. A.; Christopher States,  
372 J.; Coslo, D. M.; Omiecinski, C. J.; Cave, M. C. *Toxicol. Sci.* **2014**, *140* (2), 283–297.
- 373 (39) Portigal, C. L.; Cowell, S. P.; Fedoruk, M. N.; Butler, C. M.; Rennie, P. S.; Nelson, C. C. *Toxicol.*  
374 *Appl. Pharmacol.* **2002**, *179* (3), 185–194.
- 375 (40) Wahlang, B.; Song, M.; Beier, J. I.; Cameron Falkner, K.; Al-Eryani, L.; Clair, H. B.; Prough, R.  
376 A.; Osborne, T. S.; Malarkey, D. E.; Christopher States, J.; Cave, M. C. *Toxicol. Appl. Pharmacol.*  
377 **2014**, *279* (3), 380–390.
- 378 (41) Wahlang, B.; Song, M.; Beier, J. I.; Al-Eryani, L.; Clair, H. B.; Guardiola, J. J.; Falkner, K. C.;  
379 Prough, R. A.; Cave, M. C. *Hepatology* **2013**, *58* (4), 533A.
- 380 (42) Wahlang, B.; Petriello, M. C.; Perkins, J. T.; Shen, S.; Hennig, B. *Toxicol. Vitro.* **2016**, *35*, 180–  
381 187.
- 382 (43) Harris, T. D.; Smith, V. H. *Inl. Waters* **2016**, *6* (2), 124–130.
- 383 (44) K., W.; M., B. *Endocr. Rev.* **2018**, *39* (2), 79.
- 384 (45) Schrader, T. J.; Cooke, G. M. *Reprod. Toxicol.* **2003**, *17* (1), 15–23.
- 385 (46) Eliasson, A. C. *Thermochim. Acta* **1994**, *246* (2), 343–356.

- 386 (47) Biltonen, R. L.; Lichtenberg, D. *Chem. Phys. Lipids* **1993**, *64* (1–3), 129–142.
- 387 (48) Katsoyiannis, A.; Samara, C. *Environ. Res.* **2005**, *97* (3), 245–257.
- 388 (49) Clarke, R. M.; Cummins, E. *Hum. Ecol. Risk Assess.* **2015**, *21* (2), 492–513.
- 389 (50) Anderson, M.; Omri, A. *Drug Deliv. J. Deliv. Target. Ther. Agents* **2004**, *11* (1), 33–39.
- 390 (51) Ziobrowski, Z.; Krupiczka, R. *Inz. Chem. i Proces.* **2001**, *22* (3 E), 1561–1566.
- 391 (52) Loura, L. M. S.; Ramalho, J. P. P. *Biochim. Biophys. Acta - Biomembr.* **2007**, *1768* (3), 467–478.
- 392 (53) Ackerman, D. G.; Heberle, F. A.; Feigenson, G. W. *J. Phys. Chem. B* **2013**, *117* (17), 4844–4852.
- 393 (54) Repáková, J.; Holopainen, J. M.; Morrow, M. R.; McDonald, M. C.; Čapková, P.; Vattulainen, I.  
394 *Biophys. J.* **2005**, *88* (5), 3398–3410.
- 395 (55) Liu, J.; Conboy, J. C. *J. Am. Chem. Soc.* **2004**, *126* (29), 8894–8895.
- 396 (56) Drozd, A. V.; Tishakova, T. S. *Cent. Eur. J. Chem.* **2011**, *9* (3), 432–436.
- 397 (57) Bennett, W. F.; MacCallum, J. L.; Tieleman, D. P. *J Am Chem Soc* **2009**, *131* (5), 1972–1978.
- 398 (58) Smith, E. A.; Wang, W.; Dea, P. K. *Chem. Phys. Lipids* **2012**, *165* (2), 151–159.
- 399 (59) Juhasz, J.; Davis, J. H.; Sharom, F. J. *Biochim. Biophys. Acta - Biomembr.* **2012**, *1818* (1), 19–26.
- 400 (60) Grit, M.; Crommelin, D. J. A. *Chem. Phys. Lipids* **1993**, *64* (1–3), 3–18.
- 401 (61) Ingólfsson, H. I.; Melo, M. N.; Eerden, F. J. Van; Arnarez, C.; López, C. A.; Wassenaar, T. A.;  
402 Periole, X.; Vries, A. H. De; Tieleman, D. P.; Marrink, S. J. *J. Am. Chem. Soc.* **2014**, *136* (41),  
403 14554–14559.
- 404 (62) Fritzsching, K. J.; Kim, J.; Holland, G. P. *Biochim. Biophys. Acta - Biomembr.* **2013**, *1828* (8),  
405 1889–1898.

406  
407  
408  
409  
410  
411  
412  
413  
414  
415  
416  
417



418 **Figures**

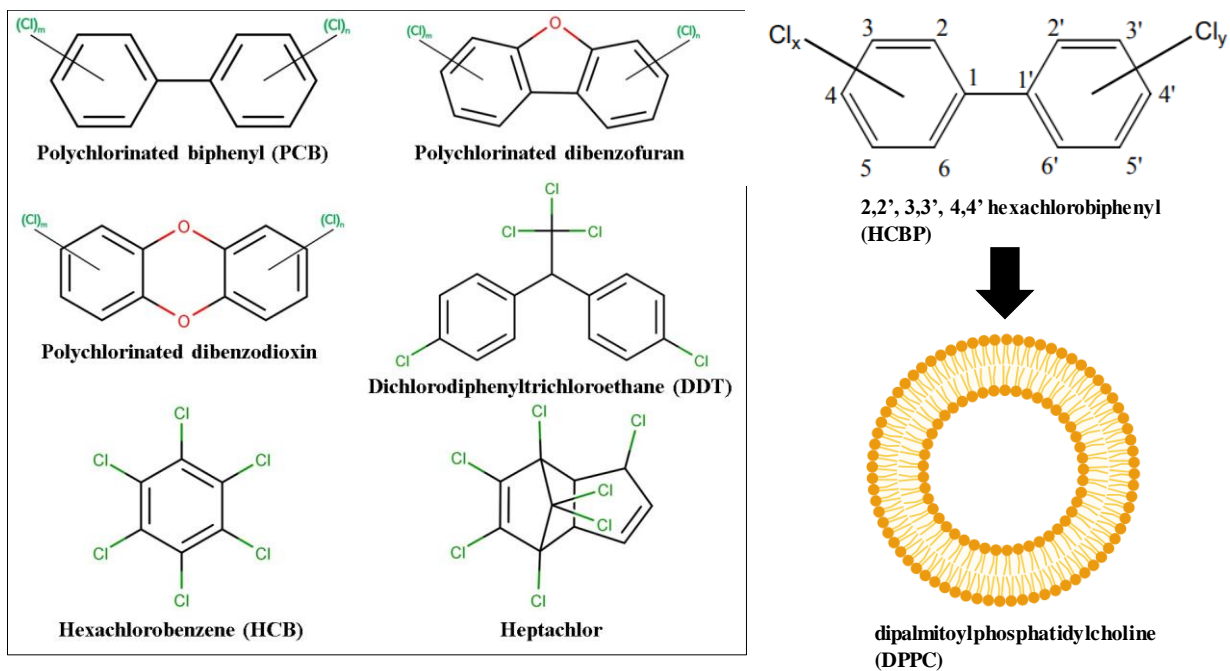

**Figure 1.** Common classes of persistent organic pollutants. General structure of a polychlorinated biphenyl (PCB) compound. Aroclor 1260 is substituted at positions 2,2', 3,3', 4,4' to give a hexachlorinated biphenyl compound (HCBP). DPPC forms a bilayered lipid structure that can capture small molecular compounds.

420

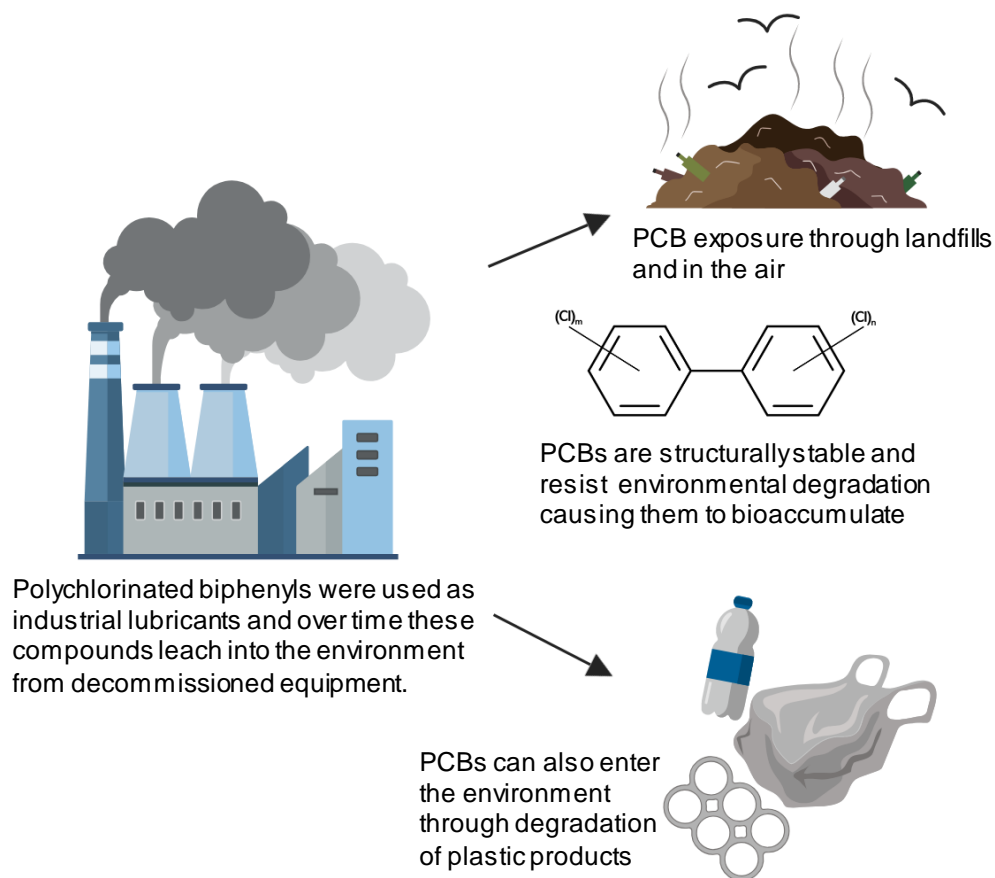

421

**Figure 2.** Schematic diagram representing the generation and life cycle of many PCBs. Their predicted bioaccumulation poses potential risks to the health of the surrounding ecosystem.

422

423

424

425

426

427

428

429

430

431

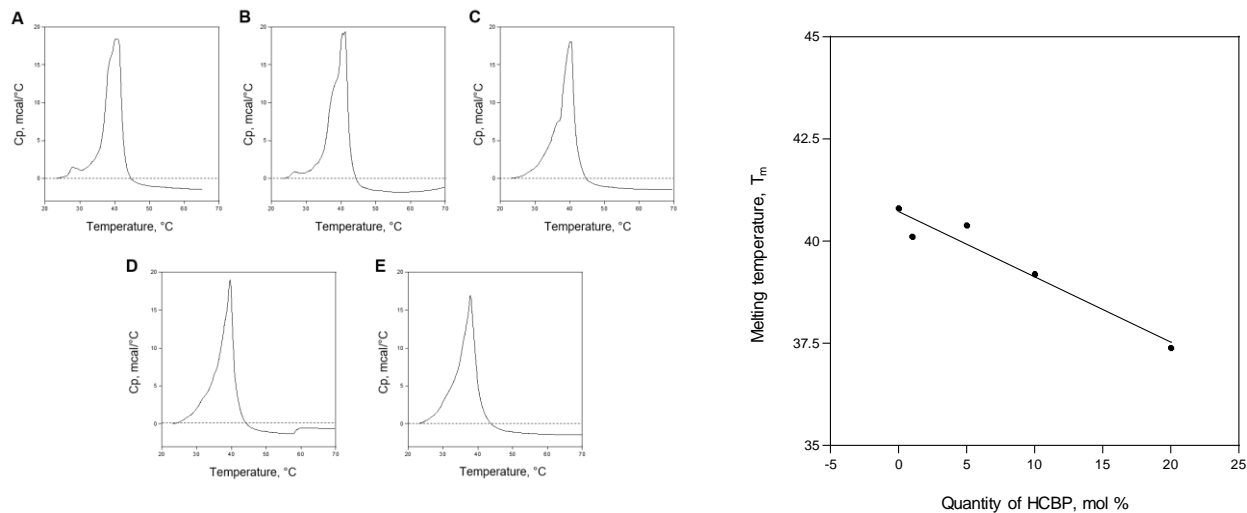

432

**Figure 3.** Differential scanning calorimetry (DSC) thermograms of DPPC liposomes prepared with various compositions of 2,2',3,3',4,4'-HCBP (Aroclor 1260). All samples were prepared with 25 mg/mL DPPC and A) 0%, B) 1%, C) 5%, D) 10%, E) 20% by mole of the compound to DPPC. The transition temperature,  $T_m$ , decreases with increasing HCBP content (*right*).

433

434

435

436

437

438

439

440

441

442

443

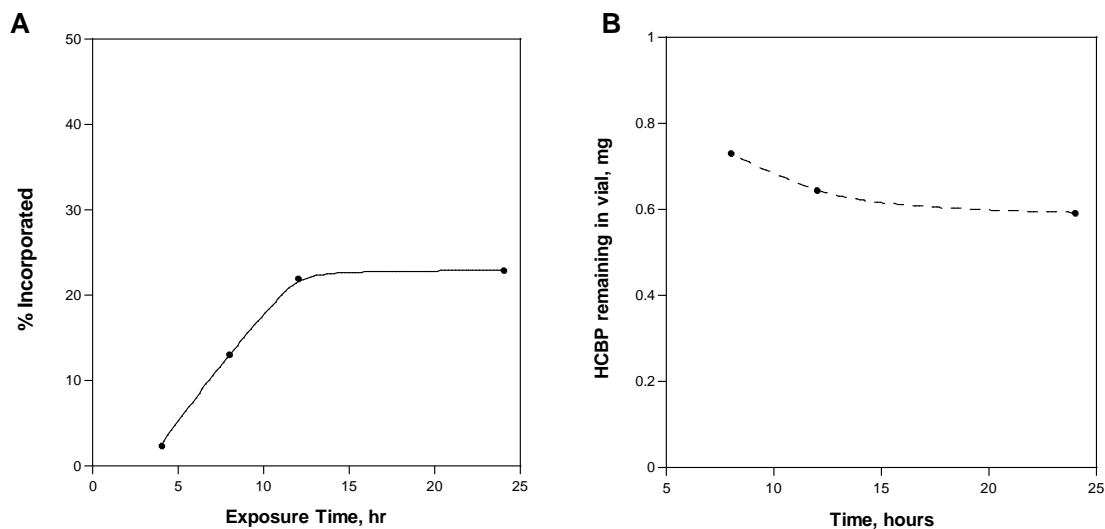

444

445

446

447

448

449

450

451

452

453

454

455

456

457

458

459

460

461

**Figure 4.** A) UV absorbance analysis of the passive incorporation of HCBP after 4, 8, 12, and 24 hours of exposure to 1 mg dried film. Incorporation increases proportionally and begins to level off after approximately 12 hours of passive exposure. B) HCBP remaining in vials after passive exposure to pure DPPC liposomes for 8, 12 and 24 hours. The amount of HCBP remaining from a dried 1 mg film decreases over time and along with the amount incorporated into liposomes represents the approximate total amount of HCBP available.

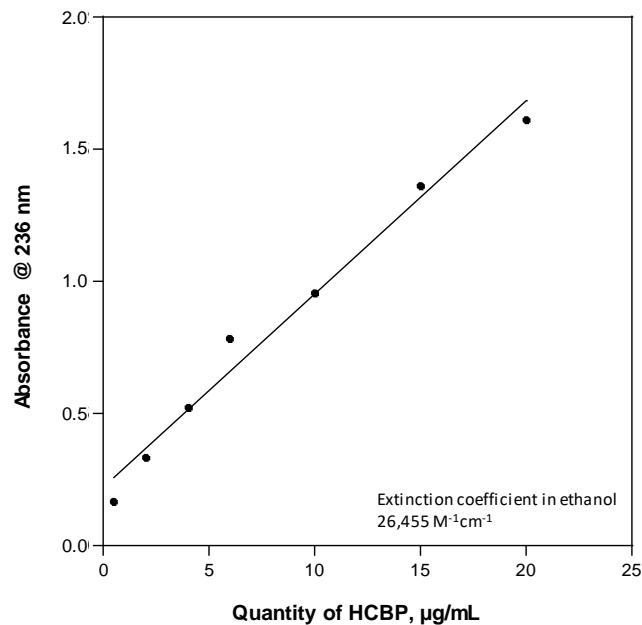

462  
463  
464  
465  
466  
467  
468  
469  
470  
471  
472  
473  
474  
475  
476  
477  
478  
479  
480

**Figure 5.** Standard curve of HCBP measured in ethanol with a calculated extinction coefficient of  $26,455 \text{ M}^{-1}\text{cm}^{-1}$ . The extinction coefficient was determined from the slope of the standard curve as a function of HCBP concentration (calculated from the Molarity). Subsequent analysis for HCBP levels was based on the calculated extinction coefficient applied to standard Beer's Law.

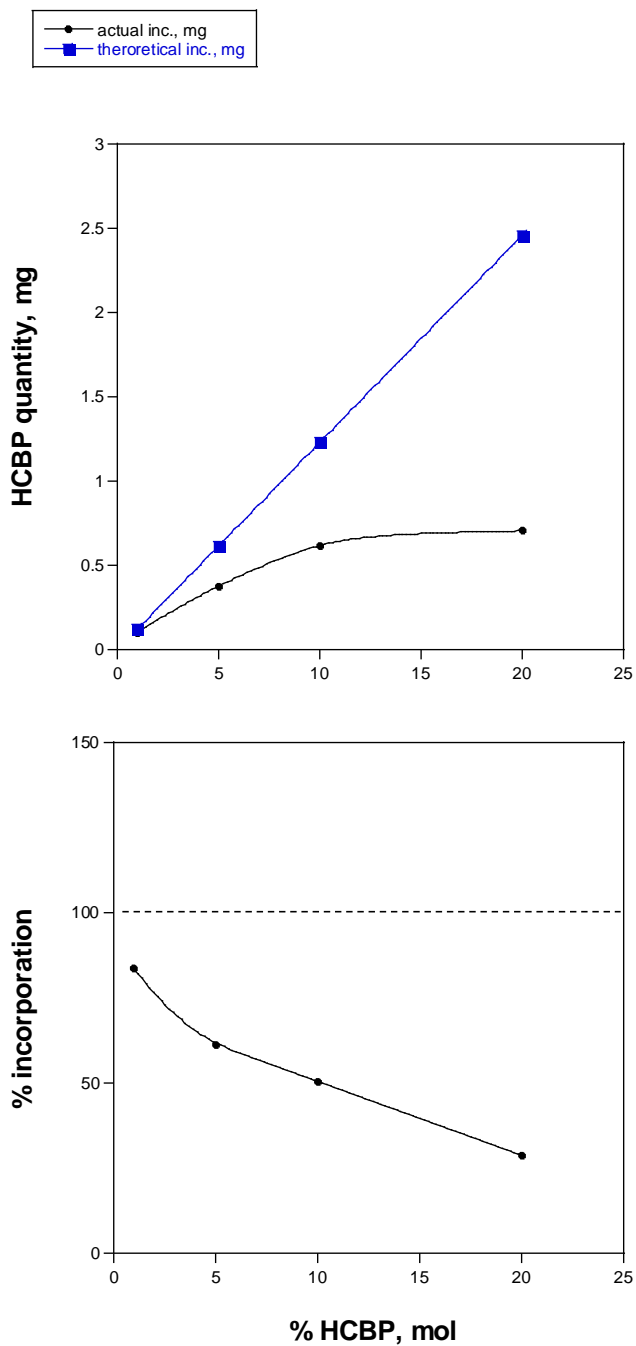

481

482

483

484

485

**Figure 6.** Theoretical vs. actual HCBP after direct incorporation. Experimental values were determined using the extinction coefficient generated from the standard curve and Beer's Law was used to quantitate HCBP from the measured absorbance for each sample.

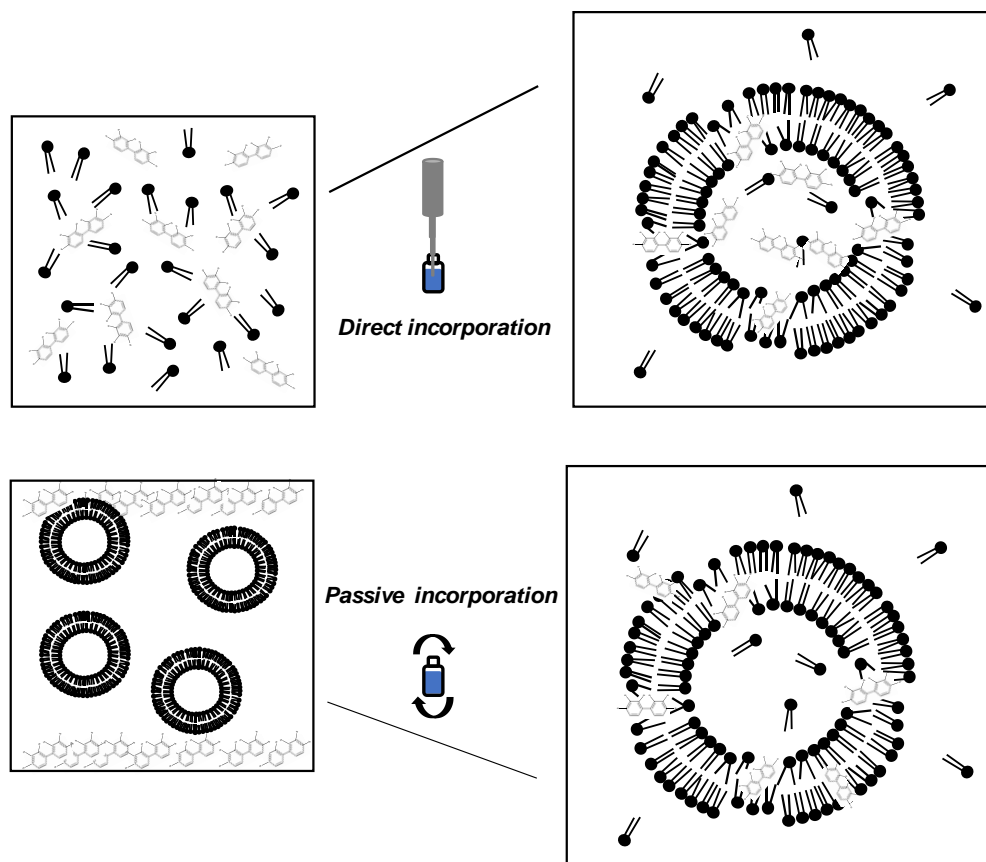

486

487

488

489

490

**Figure 7.** Schematic diagram of the direct and passive incorporation of HCBP into DPPC liposomes. Compiled UV-Vis data from the passive absorption suggests HCBP may preferentially partition into the lipid bilayer and not the aqueous environment based on the negligible absorption measurement in the buffer control (Table 3).
